# Supplementary material for: Air-Frying Is a Better Thermal Processing Choice for Improving Antioxidant Properties of Brassica Vegetables
Source: MDPI journal article supplement (doi:10.3390/antiox12020490), 2023-02-15
Supplement: s1 [file s1]

## Supplementary Data

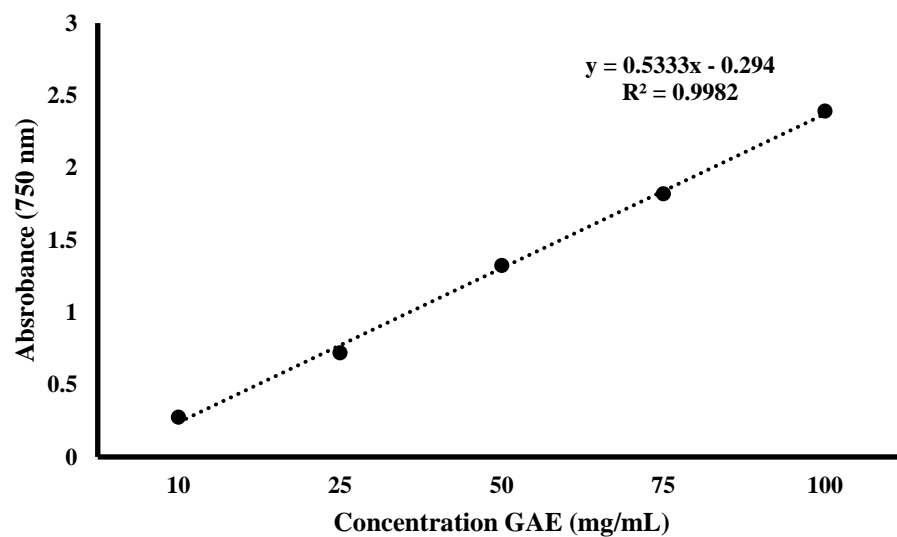

**Figure S1:** Total phenolic content standard curve using gallic acid solution (1 mM) as standard (GAE—gallic acid equivalents, mg—miligram, mL—mililiter, nm—nanometer,  $R^2$ —coefficient of variance)

## Supplementary Data

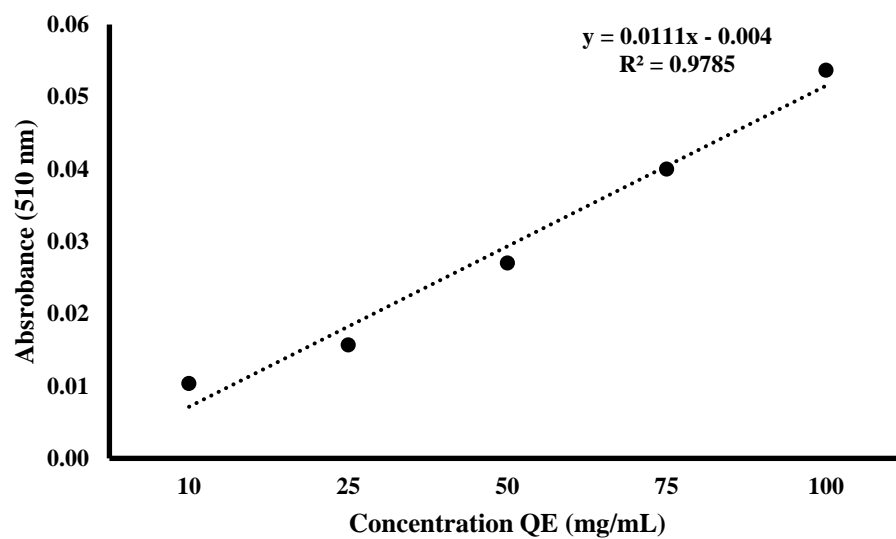

**Figure S2:** Total flavonoid content standard curve using quercetin solution (1 mM) as standard (QE—quercetin equivalents, nm—nanometer, mg—milligram, mL—milliliter,  $R^2$ —coefficient of variance)

## Supplementary Data

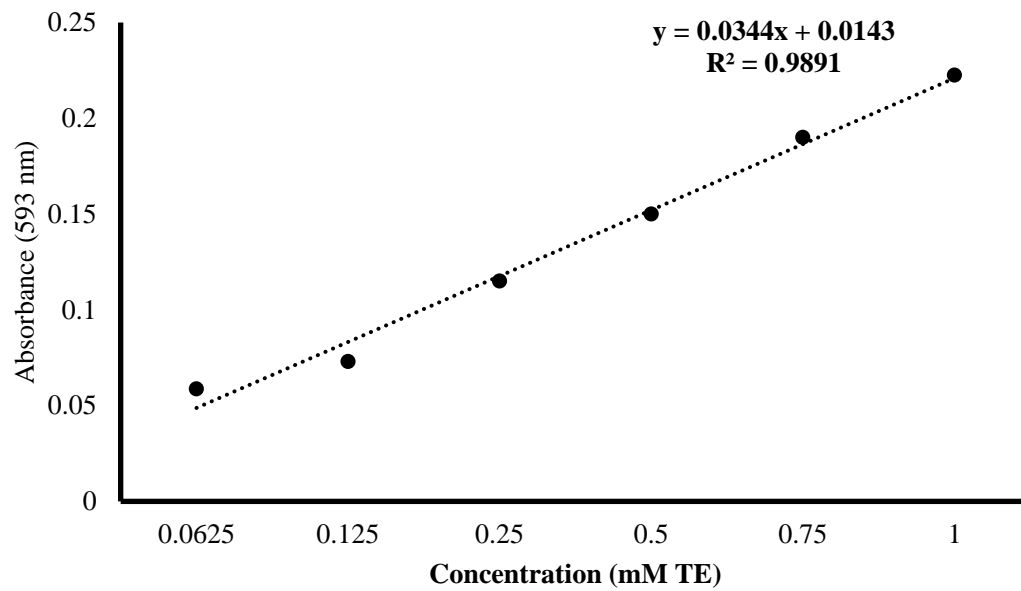

**Figure S3:** Standard curve for antioxidant activity by FRAP using trolox standard solution (1 mM) (TE—trolox equivalents, nm—nanometer, mg—milligram, mL—milliliter,  $R^2$ —coefficient of variance)

## Supplementary Data

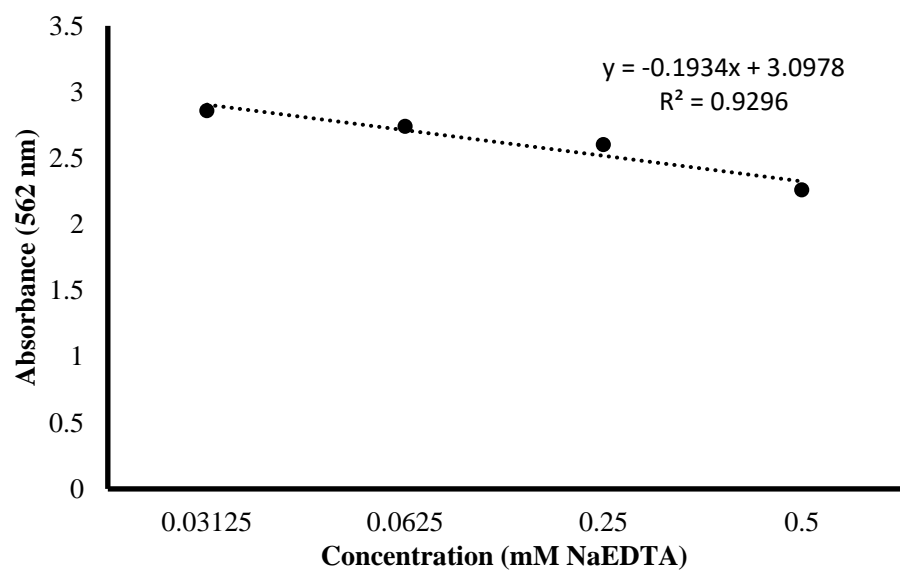

**Figure S4:** Standard curve for antioxidant activity by metal ion chelating activity using Na<sub>2</sub>EDTA standard solution (EDTAE—EDTA equivalents, nm—nanometer, mg—miligram, mL—mililiter, R<sup>2</sup>—coefficient of variance)

## Supplementary Data

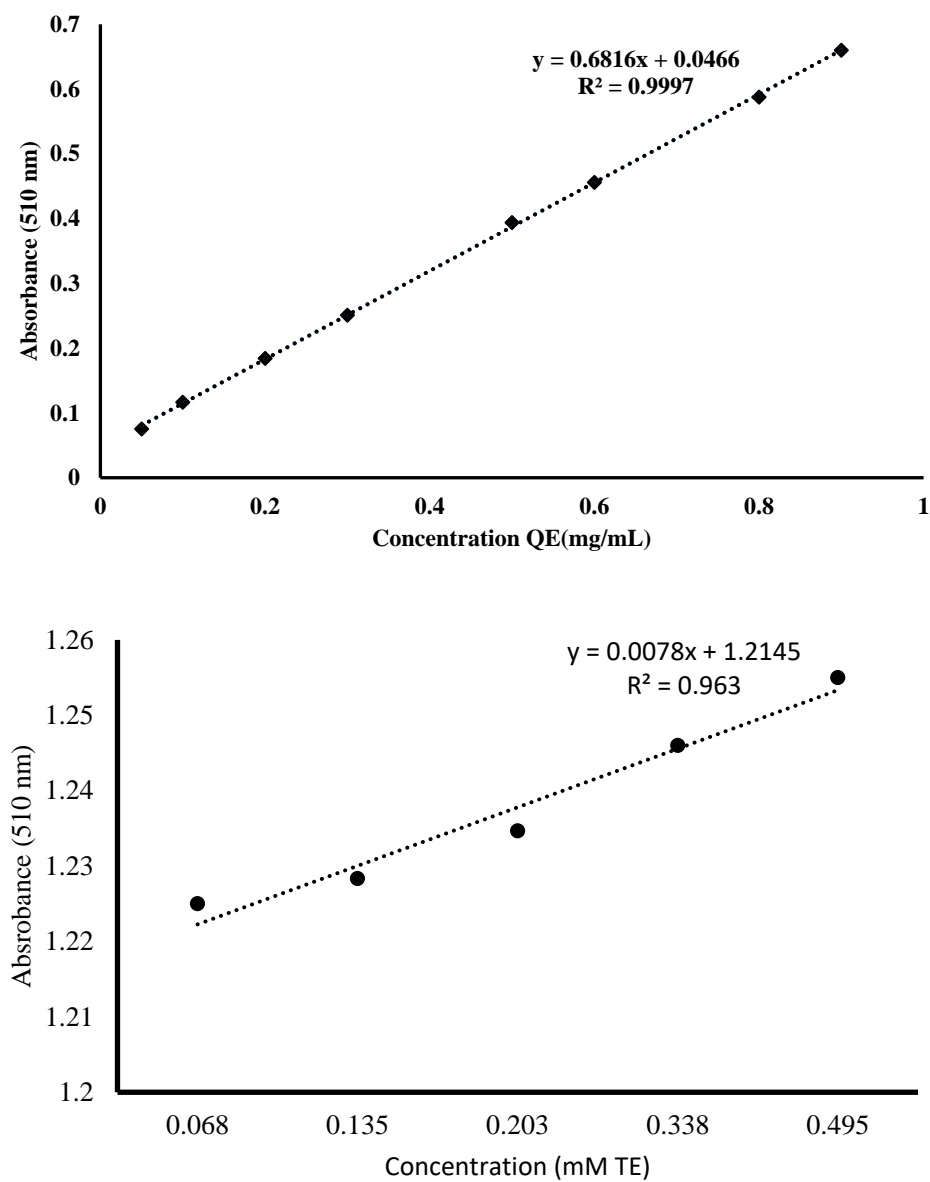

**Figure S5:** Standard curve for antioxidant activity by ABTS activity using trolox standard solution (TE—trolox equivalents, nm—nanometer, mg—milligram, mL—milliliter,  $R^2$ —coefficient of variance)
